# Supplementary material for: Description of an early Cretaceous termite (Isoptera: Kalotermitidae) and its associated intestinal protozoa, with comments on their co-evolution
Source: Springer Nature journal article supplement (doi:10.1186/1756-3305-2-12), 2009-02-18

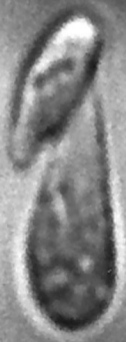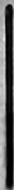

Supplement: 13071_2009_60_MOESM32_ESM.pdf [file 13071_2009_60_MOESM32_ESM.pdf]
